# Supplementary material for: The improved Trajectory-mapped Ozonesonde dataset for the Stratosphere and Troposphere (TOST): update, validation and applications
Source: Copernicus journal article supplement (doi:10.5194/acp-24-13889-2024), 2024-12-16
Supplement: Supplementary file 1 [file acp-24-13889-2024-supplement.pdf]

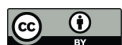

*Supplement of*

## **The improved Trajectory-mapped Ozonesonde dataset for the Stratosphere and Troposphere (TOST): update, validation and applications**

**Zhou Zang et al.**

*Correspondence to:* Jane Liu ([janejj.liu@utoronto.ca](mailto:janejj.liu@utoronto.ca))

The copyright of individual parts of the supplement might differ from the article licence.

## Section S1. The metrics for validation and comparison

Multiple metrics were used to indicate the agreement and differences between the TOST (use  $y$  here) and ozonesonde/aircraft data (use  $x$  here).

1. Correlation Coefficient (R, unitless):

$$R = \frac{\sum(x_i - \bar{x})(y_i - \bar{y})}{\sqrt{\sum(x_i - \bar{x})^2 \sum(y_i - \bar{y})^2}}, \text{ where } \bar{x} \text{ and } \bar{y} \text{ is the mean of the } x \text{ and } y \text{ variables, respectively.}$$

2. Linear fitting coefficient ( $m$ , unitless), with the intercept set to 0:

$$m = \frac{\sum(x_i y_i)}{\sum(x_i^2)}$$

3. Bias (in ppb):

$$Bias = \frac{1}{n} \sum (x_i - y_i)$$

4. Relative Difference (RD, in %):

$$RD = 100 \times \frac{Bias}{\bar{x}}, \text{ if comparing with ozonesonde data } x$$

$$RD = 100 \times \frac{Bias}{\frac{1}{2n} \sum (x_i + y_i)}, \text{ if comparing with satellite data } x$$

5. Root Mean Square Difference (RMSD, in ppb):

$$RMSD = \sqrt{\frac{1}{n} \sum (x_i - y_i)^2}$$

**Table S1.** Information on the ozonesonde stations used, including each station's ID number, name, locations, the number of profiles used, and measurement period. The stations in bold fonts are those showing a drop-off of 2-8% in the stratospheric ozone and total ozone column since 2013. The Beijing station is named the Nanjiao Meteorological Observatory.

| ID         | Station name            | Longitude    | Latitude    | Altitude  | Start-year  | End-year    | No. profiles |
|------------|-------------------------|--------------|-------------|-----------|-------------|-------------|--------------|
| 255        | Ainsworth (Airport)     | -100         | 42.6        | 789       | 1986        | 1986        | 7            |
| 494        | Alajuela                | -84.2        | 10          | 899       | 2005        | 2009        | 133          |
| 229        | Albrook                 | -79.5        | 9           | 66        | 1980        | 1980        | 20           |
| <b>18</b>  | <b>Alert</b>            | <b>-62.3</b> | <b>82.5</b> | <b>62</b> | <b>1987</b> | <b>2021</b> | <b>1650</b>  |
| 111        | Amundsen-scott          | -24.8        | -90         | 2810      | 1970        | 1987        | 183          |
| 348        | Ankara                  | 32.9         | 40          | 891       | 1994        | 2012        | 340          |
| <b>328</b> | <b>Ascension Island</b> | <b>-14.2</b> | <b>-7.6</b> | <b>91</b> | <b>1990</b> | <b>2021</b> | <b>905</b>   |
| 483        | Barbados                | -59.4        | 13.2        | 32        | 2006        | 2006        | 27           |
| 199        | Barrow                  | -156.6       | 71.3        | 11        | 1974        | 2008        | 21           |
| 104        | Bedford                 | -71.3        | 42.5        | 80        | 1970        | 1971        | 53           |
| /          | Beijing                 | 116.5        | 39.8        | 30        | 2001        | 2019        | 902          |
| /          | Belgrano                | -34.6        | -77.9       | 250       | 2016        | 2021        | 119          |
| 420        | Beltsville (md)         | -76.5        | 39          | 72        | 2006        | 2006        | 12           |
| 181        | Berlin/Templehof        | 13.4         | 52.5        | 50        | 1970        | 1973        | 134          |
| 197        | Biscarrosse/Sms         | -1.2         | 44.4        | 18        | 1976        | 1983        | 359          |
| 525        | Bogota                  | -74.1        | 4.7         | 2541      | 1998        | 2008        | 64           |
| 67         | Boulder Esrl Hq (co)    | -105.2       | 39.9        | 1743      | 1970        | 2022        | 1976         |
| 338        | Bratts Lake             | -104.7       | 50.2        | 580       | 2003        | 2011        | 405          |

|            |                      |               |             |            |             |             |             |
|------------|----------------------|---------------|-------------|------------|-------------|-------------|-------------|
| 329        | Brazzaville          | 15.2          | -4.3        | 314        | 1990        | 1992        | 82          |
| 394        | Broadmeadows         | 144.9         | -37.7       | 110        | 1999        | 2021        | 1075        |
| 38         | Cagliari/Elmas       | 9.1           | 39.2        | 4          | 1970        | 1980        | 379         |
| 20         | Caribou              | -68           | 46.9        | 192        | 1981        | 1981        | 1           |
| 444        | Cheju                | 126.5         | 33.5        | 300        | 2001        | 2001        | 13          |
| 224        | Chilca               | -76.8         | -12.5       | -1         | 1975        | 1975        | 3           |
| <b>77</b>  | <b>Churchill</b>     | <b>-94.1</b>  | <b>58.8</b> | <b>35</b>  | <b>1973</b> | <b>2021</b> | <b>1748</b> |
| 198        | Cold Lake            | -110          | 54.8        | 702        | 1977        | 1981        | 66          |
| 236        | Coolidge Field       | -61.8         | 17.3        | 10         | 1976        | 1976        | 7           |
| 472        | Cotonou              | 2.2           | 6.2         | 9.5        | 2005        | 2007        | 97          |
| 334        | Cuiaba               | -56.1         | -15.6       | 990        | 1992        | 1992        | 21          |
| 450        | Davis                | 78            | -68.6       | 14         | 2003        | 2019        | 501         |
| 316        | De Bilt              | 5.2           | 52.1        | 4          | 1992        | 2021        | 1528        |
| 238        | Denver               | -104.9        | 39.8        | 1611       | 1977        | 1977        | 1           |
| /          | Dumont               | 140           | -66.4       | 20         | 1991        | 2019        | 704         |
| 441        | Easter Island        | -109.4        | -27.2       | 69.2       | 1995        | 2021        | 323         |
| 456        | Egbert               | -79.8         | 44.2        | 251        | 2003        | 2011        | 372         |
| 213        | El Arenosillo        | -6.7          | 37.1        | 41         | 1977        | 1983        | 18          |
| 335        | Etosha Pan           | 15.9          | -19.2       | 1100       | 1992        | 1992        | 16          |
| <b>315</b> | <b>Eureka</b>        | <b>-86.4</b>  | <b>80</b>   | <b>10</b>  | <b>1992</b> | <b>2021</b> | <b>1911</b> |
| 203        | Ft. Sherman          | -80           | 9.3         | 57         | 1977        | 1977        | 16          |
| 228        | Gimli                | -97           | 50.6        | 228        | 1980        | 1985        | 31          |
| 76         | Goose Bay            | -60.3         | 53.3        | 44         | 1970        | 2021        | 2317        |
| 237        | Great Falls          | -111.3        | 47.5        | 1118       | 1977        | 1977        | 4           |
| <b>330</b> | <b>Hanoi</b>         | <b>105.8</b>  | <b>21</b>   | <b>6</b>   | <b>2004</b> | <b>2021</b> | <b>350</b>  |
| 40         | Haute provence       | 5.7           | 43.9        | 684        | 1981        | 1997        | 61          |
| 477        | Heredia              | -84.1         | 10          | 1176       | 2005        | 2011        | 127         |
| <b>109</b> | <b>Hilo (hi)</b>     | <b>-155.1</b> | <b>19.7</b> | <b>11</b>  | <b>1982</b> | <b>2021</b> | <b>1742</b> |
| 92         | Hobart               | 147.5         | -42.8       | 4          | 2021        | 2021        | 1           |
| 99         | Hohenpeissenberg     | 11            | 47.8        | 976        | 1970        | 2021        | 6058        |
| 361        | Holtville (ca)       | -115.4        | 32.8        | -19        | 2006        | 2006        | 13          |
| 484        | Houston (tx)         | -95.4         | 29.7        | 19         | 2004        | 2006        | 62          |
| 418        | Huntsville           | -86.6         | 35.3        | 196        | 1999        | 2007        | 575         |
| 303        | Iqaluit              | -68.5         | 63.8        | 20         | 1991        | 1992        | 30          |
| 265        | Irene                | 28.2          | -25.9       | 1524       | 1990        | 2021        | 540         |
| 336        | Isfahan              | 51.7          | 32.5        | 1550       | 1995        | 2011        | 151         |
| 404        | Jokioinen            | 23.5          | 60.8        | 103        | 1995        | 1998        | 99          |
| 439        | Kaashidhoo           | 73.5          | 5           | 1          | 1999        | 1999        | 54          |
| 7          | Kagoshima            | 130.6         | 31.6        | 283        | 1970        | 2005        | 816         |
| <b>457</b> | <b>Kelowna</b>       | <b>-119.4</b> | <b>49.9</b> | <b>456</b> | <b>2003</b> | <b>2017</b> | <b>700</b>  |
| 344        | Kings park           | 114.2         | 22.3        | 66         | 2000        | 2021        | 976         |
| 225        | Kourou               | -52.6         | 5.3         | 4          | 1974        | 1974        | 3           |
| 436        | La Reunion           | 55.5          | -21.1       | 24         | 1998        | 2021        | 816         |
| /          | Laquila              | 13.3          | 42.4        | 683        | 1994        | 2021        | 309         |
| <b>256</b> | <b>Lauder</b>        | <b>169.7</b>  | <b>-45</b>  | <b>370</b> | <b>1986</b> | <b>2021</b> | <b>1966</b> |
| 254        | Laverton             | 144.8         | -37.9       | 21         | 1984        | 1999        | 340         |
| 221        | Legionowo            | 21            | 52.4        | 96         | 1979        | 2021        | 2170        |
| 43         | Lerwick              | -1.2          | 60.1        | 80         | 1992        | 2016        | 1223        |
| 174        | Lindenberg           | 14.1          | 52.2        | 112        | 1975        | 2021        | 2727        |
| 235        | Long View            | -94.8         | 32.5        | 103        | 1976        | 1976        | 2           |
| 29         | Macquarie Island     | 159           | -54.5       | 6          | 1994        | 2021        | 1176        |
| 308        | Madrid               | -3.8          | 40.5        | 640        | 1994        | 2021        | 1132        |
| 400        | Maitri               | 11.4          | -70.5       | 330        | 1994        | 2008        | 141         |
| 448        | Malindi              | 40.2          | -3          | -6         | 1999        | 2006        | 191         |
| 233        | Marambio             | -56.6         | -64.2       | 198        | 1988        | 2019        | 1286        |
| 466        | Maxaranguape (Natal) | -35.4         | -5.4        | 42         | 2002        | 2016        | 355         |

|            |                                 |               |              |             |             |             |             |
|------------|---------------------------------|---------------|--------------|-------------|-------------|-------------|-------------|
| /          | Mcmurdo                         | 166.7         | -78.8        | 10          | 1986        | 2010        | 822         |
| 88         | Mirny                           | 93            | -66.5        | 30          | 1989        | 1991        | 114         |
| 190        | Naha                            | 127.7         | 26.2         | 27          | 1989        | 2018        | 1107        |
| <b>175</b> | <b>Nairobi</b>                  | <b>36.8</b>   | <b>-1.3</b>  | <b>1710</b> | <b>1996</b> | <b>2020</b> | <b>1001</b> |
| 487        | Narragansett                    | -71.4         | 41.5         | 21          | 2006        | 2008        | 51          |
| 219        | Natal                           | -35.2         | -5.8         | 32          | 1979        | 2021        | 866         |
| 323        | Neumayer                        | -8.3          | -70.7        | 42          | 1992        | 2017        | 1737        |
| 10         | New Delhi                       | 77.1          | 28.3         | 273         | 1984        | 2016        | 197         |
| 280        | Novolasarevskaya/Forster        | 11.9          | -70.8        | 110         | 1985        | 1991        | 393         |
| 89         | Ny-aalesund                     | 11.9          | 78.9         | 11          | 1992        | 2021        | 2562        |
| /          | OHP                             | 5.7           | 43.9         | 777         | 1991        | 2021        | 1428        |
| <b>523</b> | <b>Pago Pago/American Samoa</b> | <b>-170.6</b> | <b>-14.2</b> | <b>77</b>   | <b>1998</b> | <b>2021</b> | <b>850</b>  |
| 210        | Palestine                       | -95.7         | 31.8         | 121         | 1975        | 1985        | 163         |
| 432        | Papeete (Tahiti)                | -149          | -18          | 2           | 1995        | 1999        | 168         |
| 488        | Paradox                         | -73.6         | 43.9         | 284         | 2006        | 2006        | 8           |
| 435        | Paramaribo                      | -55.2         | 5.8          | 7           | 1999        | 2021        | 834         |
| 156        | Payerne                         | 6.6           | 46.5         | 491         | 1970        | 2021        | 6693        |
| 360        | Pellston (mi)                   | -84.7         | 45.6         | 235         | 2004        | 2004        | 38          |
| 322        | Petaling Jaya                   | 101.7         | 2.7          | 17          | 1998        | 2021        | 477         |
| 332        | Pohang                          | 129.4         | 36           | 2.5         | 1995        | 2020        | 1050        |
| 217        | Poker Flat                      | -147.5        | 65.1         | 204         | 1979        | 1982        | 40          |
| 187        | Poona                           | 73.8          | 18.5         | 559         | 1984        | 2009        | 140         |
| 526        | Port Hardy                      | -127.4        | 50.7         | 17          | 2018        | 2021        | 137         |
| 333        | Porto Nacional                  | -48.4         | -10.8        | 240         | 1992        | 1992        | 15          |
| 242        | Praha                           | 14.4          | 50           | 304         | 1979        | 2021        | 1873        |
| 440        | r h Brown Research Ship         | -65.6         | 30.6         | 2           | 1999        | 2006        | 89          |
| 212        | r/v a.k.Shirshov                | 75            | -15          | -1          | 1977        | 1977        | 32          |
| <b>24</b>  | <b>Resolute</b>                 | <b>-95</b>    | <b>74.7</b>  | <b>64</b>   | <b>1970</b> | <b>2021</b> | <b>2037</b> |
| 489        | Richland                        | -119.2        | 46.2         | 123         | 2006        | 2006        | 24          |
| 297        | S.Pietro Capofiume              | 11.6          | 44.6         | 11          | 1984        | 1993        | 98          |
| 480        | Sable Island                    | -60           | 43.9         | 4           | 2004        | 2006        | 61          |
| <b>434</b> | <b>San Cristobal</b>            | <b>-89.6</b>  | <b>-0.9</b>  | <b>8</b>    | <b>1998</b> | <b>2021</b> | <b>445</b>  |
| 239        | San Diego                       | -117.2        | 32.8         | 124         | 1977        | 1977        | 2           |
| 234        | San Juan                        | -66.1         | 18.5         | 17          | 1976        | 1976        | 6           |
| <b>524</b> | <b>San Pedro</b>                | <b>-84.2</b>  | <b>10</b>    | <b>899</b>  | <b>2005</b> | <b>2021</b> | <b>658</b>  |
| 401        | Santa Cruz-Botanico (Tenerife)  | -16.3         | 28.5         | 36          | 1995        | 2021        | 1362        |
| 12         | Sapporo                         | 141.3         | 43.1         | 19          | 1970        | 2018        | 1392        |
| 406        | Scoresbysund                    | -21.9         | 70.5         | 9999        | 1989        | 2020        | 1494        |
| 443        | Sepang Airport                  | 101.7         | 2.7          | 17          | 1998        | 2017        | 372         |
| 214        | Singapore                       | 103.9         | 1.3          | 36          | 2012        | 2015        | 37          |
| 262        | Sodankyla                       | 26.6          | 67.4         | 179         | 1988        | 2021        | 1763        |
| 132        | Sofia                           | 23.4          | 42.8         | 588         | 1982        | 1991        | 239         |
| 997        | South Pole                      | -169          | -90          | 2834        | 1970        | 2021        | 2251        |
| 231        | Spokane                         | -117.4        | 47.7         | 576         | 1976        | 1976        | 7           |
| <b>21</b>  | <b>Stonyplain/Edmonton</b>      | <b>-114.1</b> | <b>53.5</b>  | <b>766</b>  | <b>1970</b> | <b>2021</b> | <b>2121</b> |
| 491        | Summit                          | -38.5         | 72.6         | 3202        | 2005        | 2015        | 551         |
| <b>438</b> | <b>Suva/Fuji</b>                | <b>178.2</b>  | <b>-18.1</b> | <b>6</b>    | <b>1997</b> | <b>2021</b> | <b>502</b>  |
| 101        | Syowa                           | 39.6          | -69          | 21          | 1970        | 2021        | 1925        |
| 260        | Table Mountain (ca)             | -117.7        | 34.4         | 2285        | 2006        | 2006        | 35          |
| 95         | Taipei                          | 121.4         | 25           | 11          | 2000        | 2021        | 141         |
| 14         | Tateno (Tsukuba)                | 140.1         | 36.1         | 31          | 1970        | 2021        | 1876        |
| 485        | Tecamec (Unam)                  | -99.2         | 19.3         | 2272        | 2006        | 2006        | 35          |
| 205        | Thiruvananthapuram              | 77            | 8.5          | 60          | 1984        | 2009        | 205         |
| 460        | Thule                           | -68.7         | 76.5         | 57          | 1991        | 2003        | 249         |
| 65         | Toronto                         | -79.5         | 43.8         | 198         | 1976        | 1994        | 15          |
| 445        | Trinidad Head                   | -124.1        | 41.1         | 36          | 1997        | 2021        | 1286        |

|            |                  |              |             |          |             |             |            |
|------------|------------------|--------------|-------------|----------|-------------|-------------|------------|
| 53         | Uccle            | 4.3          | 50.8        | 100      | 1970        | 2021        | 6352       |
| 339        | Ushuaia          | -68.3        | -54.9       | 17       | 2008        | 2019        | 227        |
| 318        | Valentia         | -10.2        | 51.9        | 14       | 1994        | 2021        | 745        |
| 490        | Valparaiso (in)  | -87          | 41.5        | 240      | 2006        | 2006        | 18         |
| 257        | Vanscoy          | -107.3       | 52.2        | 510      | 1990        | 2004        | 57         |
| 55         | Vigna Di Valle   | 12.2         | 42.1        | 260      | 2011        | 2021        | 172        |
| 107        | Wallops Island   | -75.5        | 37.9        | 13       | 1970        | 2020        | 2113       |
| 482        | Walsingham       | -80.6        | 42.6        | 200      | 2006        | 2006        | 43         |
| 437        | Watukosek (Java) | 112.7        | -7.6        | 50       | 1998        | 2021        | 357        |
| <b>458</b> | <b>Yarmouth</b>  | <b>-66.1</b> | <b>43.9</b> | <b>9</b> | <b>2003</b> | <b>2021</b> | <b>794</b> |
| 194        | Yorkton          | -102.5       | 51.3        | 504      | 1975        | 1978        | 72         |

**Table S2.** Information on the airports from In-Service Aircraft for a Global Observing System (IAGOS) used (310 in total), including each airport's name, measurement period and the number of flights used.

| <b>Airport name</b> | <b>Start year</b> | <b>End year</b> | <b>Number of flights</b> |
|---------------------|-------------------|-----------------|--------------------------|
| ABIDJAN             | 1997              | 2017            | 145                      |
| ABU-DHABI           | 1999              | 2017            | 148                      |
| ABUJA               | 2003              | 2021            | 135                      |
| ACCRA               | 2000              | 2018            | 94                       |
| ADDIS-ABABA         | 2001              | 2019            | 206                      |
| ADELAIDE            | 2013              | 2015            | 9                        |
| AGADIR              | 2001              | 2001            | 1                        |
| AKITA               | 2013              | 2013            | 1                        |
| ALGHERO             | 2018              | 2018            | 1                        |
| ALMATY              | 1999              | 2020            | 169                      |
| ALMERIA             | 2002              | 2002            | 1                        |
| AMMAN               | 2006              | 2020            | 5                        |
| AMSTERDAM           | 1995              | 2016            | 175                      |
| ANGELES-CITY        | 2015              | 2015            | 1                        |
| ANKARA              | 1997              | 1997            | 1                        |
| ANTALYA             | 1996              | 2006            | 29                       |
| ANTANANARIVO        | 1997              | 2018            | 57                       |
| ANTIGUA             | 1994              | 1995            | 16                       |
| APIA                | 2018              | 2018            | 6                        |
| ASHGABAT            | 2001              | 2013            | 32                       |
| ASMARA              | 2002              | 2012            | 18                       |
| ASTANA              | 2006              | 2020            | 141                      |
| ATHENS              | 1997              | 2017            | 8                        |
| ATLANTA             | 1994              | 2020            | 1292                     |
| AUCKLAND            | 2016              | 2020            | 70                       |
| AUSTIN              | 2019              | 2020            | 16                       |
| BAHRAIN             | 2007              | 2021            | 183                      |
| BAKU                | 2001              | 2013            | 49                       |
| BALTIMORE           | 2006              | 2006            | 1                        |
| BAMAKO              | 2013              | 2017            | 89                       |
| BAMENDA             | 2018              | 2018            | 1                        |
| BANGALORE           | 2015              | 2021            | 24                       |
| BANGKOK             | 1994              | 2020            | 1108                     |
| BANJUL              | 1997              | 1997            | 1                        |
| BARCELONA           | 2016              | 2016            | 1                        |
| BEIJING             | 1995              | 2018            | 642                      |
| BEIRUT              | 1998              | 2018            | 74                       |

---

|                 |      |      |      |
|-----------------|------|------|------|
| BERLIN          | 1994 | 2018 | 30   |
| BOGOTA          | 1994 | 2021 | 522  |
| BORDEAUX        | 1998 | 2018 | 16   |
| BOSTON          | 1994 | 2021 | 1029 |
| BRATISLAVA      | 1996 | 2000 | 3    |
| BRAZZAVILLE     | 1997 | 2018 | 26   |
| BREMEN          | 1997 | 2009 | 3    |
| BRISBANE        | 2013 | 2020 | 87   |
| BRUSSELS        | 1997 | 2009 | 1389 |
| BUCHAREST       | 2004 | 2006 | 2    |
| BUDAPEST        | 2000 | 2000 | 1    |
| BUENOS-AIRES    | 1994 | 2016 | 46   |
| BUSAN           | 2016 | 2019 | 21   |
| CAIRNS          | 2013 | 2014 | 19   |
| CAIRO           | 1998 | 2019 | 240  |
| CALDWELL        | 1995 | 1995 | 1    |
| CALGARY         | 2009 | 2012 | 153  |
| CALI            | 1995 | 1995 | 1    |
| CAMPINAS        | 1996 | 1999 | 3    |
| CANCUN          | 2001 | 2021 | 15   |
| CAPE-TOWN       | 1996 | 2021 | 111  |
| CARACAS         | 1994 | 2018 | 808  |
| CAYENNE         | 1994 | 2013 | 140  |
| CEBU            | 2013 | 2018 | 41   |
| CHANGCHA        | 2015 | 2019 | 17   |
| CHARLOTTE       | 2004 | 2019 | 22   |
| CHENGDU         | 2013 | 2018 | 7    |
| CHICAGO         | 1994 | 2019 | 896  |
| CHONGJU         | 2017 | 2017 | 1    |
| CHONGQING       | 2019 | 2019 | 3    |
| CHRISTCHURCH    | 2016 | 2018 | 19   |
| CINCINNATI      | 1997 | 2004 | 176  |
| CLEVELAND       | 2017 | 2017 | 2    |
| COLOGNE         | 1995 | 2018 | 12   |
| COLOMBO         | 1994 | 2018 | 69   |
| CONAKRY         | 1998 | 2018 | 111  |
| COTONOU         | 1997 | 2018 | 128  |
| DAKAR           | 1997 | 2018 | 58   |
| DALAMAN         | 1995 | 2005 | 6    |
| DALIAN          | 2015 | 2016 | 2    |
| DALLAS          | 1995 | 2020 | 958  |
| DAMMAM          | 2000 | 2020 | 152  |
| DARWIN          | 2004 | 2004 | 2    |
| DELHI           | 1995 | 2021 | 623  |
| DENPASAR        | 2014 | 2019 | 61   |
| DENVER          | 2001 | 2020 | 44   |
| DETROIT         | 1999 | 2020 | 413  |
| DHAHRAN         | 1999 | 1999 | 1    |
| DJIBOUTI        | 2013 | 2018 | 12   |
| DOHA            | 2011 | 2017 | 179  |
| DONAUESCHINGEN  | 2018 | 2018 | 1    |
| DOUALA          | 1997 | 2018 | 116  |
| DRESDEN         | 1999 | 2018 | 3    |
| DRUMMOND-ISLAND | 2018 | 2018 | 1    |
| DUBAI           | 1997 | 2020 | 537  |
| DUBLIN          | 2019 | 2020 | 3    |

---

|                       |      |      |      |
|-----------------------|------|------|------|
| DUBROVNIK             | 1999 | 1999 | 2    |
| DURBAN                | 2008 | 2008 | 1    |
| DUSSELDORF            | 1995 | 2015 | 643  |
| ENTEBBE               | 1997 | 1998 | 25   |
| FAIRBANKS             | 2015 | 2016 | 7    |
| FRANKFURT             | 1994 | 2021 | 8514 |
| FREETOWN              | 2009 | 2018 | 41   |
| FRESNO                | 2017 | 2017 | 1    |
| FUJEIRAH              | 2015 | 2015 | 1    |
| FUKUOKA               | 2012 | 2020 | 146  |
| GANDER                | 2004 | 2004 | 1    |
| GERONA                | 2018 | 2018 | 3    |
| GIEBELSTADT           | 2011 | 2011 | 1    |
| GOOSE-BAY             | 2000 | 2000 | 1    |
| GRAN-CANARIA          | 2002 | 2016 | 4    |
| GREENVILE             | 1997 | 1997 | 1    |
| GUAM                  | 2016 | 2019 | 7    |
| GUANGZHOU             | 2004 | 2018 | 92   |
| GUATEMALA-CITY        | 2014 | 2015 | 26   |
| GUAYAQUIL             | 1997 | 2016 | 22   |
| HAMBURG               | 1997 | 2019 | 20   |
| HANGZHOU              | 2017 | 2017 | 1    |
| HANNOVER              | 2000 | 2000 | 1    |
| HANOI                 | 1994 | 2019 | 145  |
| HARARE                | 1998 | 2008 | 47   |
| HAVANA                | 2003 | 2018 | 19   |
| HEFEI                 | 2016 | 2016 | 1    |
| HELSINKI              | 1997 | 1997 | 1    |
| HERAKLION             | 1996 | 1997 | 16   |
| HIROSHIMA             | 2016 | 2018 | 10   |
| HO-CHI-MINH-CITY      | 1994 | 2019 | 321  |
| HOLGUIN               | 2001 | 2001 | 4    |
| HONG-KONG             | 1999 | 2021 | 1580 |
| HONOLULU              | 2015 | 2020 | 570  |
| HOUSTON               | 1994 | 2021 | 474  |
| HUESCA                | 1998 | 1998 | 1    |
| HURGHADA              | 2000 | 2001 | 11   |
| HYDERABAD             | 2005 | 2018 | 450  |
| IBARAKI               | 2001 | 2001 | 1    |
| ILORIN                | 2018 | 2018 | 1    |
| ISLAMABAD             | 2001 | 2001 | 1    |
| ISTANBUL              | 1995 | 1995 | 1    |
| JAKARTA               | 1996 | 2018 | 157  |
| JEDDAH                | 1999 | 2019 | 193  |
| JOHANNESBURG          | 1995 | 2011 | 256  |
| KAGOSHIMA             | 2012 | 2018 | 4    |
| KAHULUI               | 2017 | 2018 | 73   |
| KAOHSIUNG             | 2013 | 2018 | 25   |
| KARLSRUHE-BADEN-BADEN | 2018 | 2018 | 1    |
| KATHMANDU             | 2002 | 2006 | 10   |
| KHABAROVSK            | 1997 | 1997 | 1    |
| KHARTOUM              | 2000 | 2014 | 102  |
| KIGALI                | 1997 | 1998 | 32   |
| KINSHASA              | 1998 | 2018 | 69   |
| KOBE                  | 1998 | 1998 | 4    |
| KOBLENZ               | 1995 | 2001 | 2    |

---

|                         |      |      |      |
|-------------------------|------|------|------|
| KOCHI                   | 2018 | 2018 | 1    |
| KOLKATA                 | 2009 | 2009 | 1    |
| KONA                    | 2017 | 2020 | 37   |
| KUALA-LUMPUR            | 1998 | 2019 | 207  |
| KUWAIT-CITY             | 2001 | 2020 | 241  |
| LAAGE                   | 2004 | 2004 | 2    |
| LAGOS                   | 1997 | 2020 | 310  |
| LAJES-(TERCEIRA-ISLAND) | 2016 | 2016 | 1    |
| LARNACA                 | 2000 | 2000 | 1    |
| LAS-VEGAS               | 2017 | 2018 | 48   |
| LEIPZIG                 | 1999 | 1999 | 2    |
| LIBREVILLE              | 1997 | 2018 | 25   |
| LIMA                    | 1994 | 2016 | 28   |
| LINZ                    | 2018 | 2018 | 1    |
| LISBON                  | 1999 | 2019 | 4    |
| LOME                    | 1997 | 2018 | 112  |
| LONDON                  | 1995 | 2016 | 244  |
| LOS-ANGELES             | 1995 | 2020 | 317  |
| LUANDA                  | 1997 | 2020 | 190  |
| LUSAKA                  | 2012 | 2012 | 1    |
| LUXOR                   | 2001 | 2018 | 5    |
| LYON                    | 2017 | 2020 | 3    |
| MADRAS                  | 1994 | 2018 | 521  |
| MADRID                  | 2014 | 2016 | 255  |
| MALABO                  | 2014 | 2020 | 164  |
| MALAGA                  | 1998 | 2001 | 4    |
| MALE                    | 1997 | 2021 | 63   |
| MALTA                   | 2011 | 2019 | 15   |
| MANCHESTER              | 2012 | 2012 | 1    |
| MANILA                  | 2005 | 2020 | 232  |
| MAPUTO                  | 1998 | 1999 | 6    |
| MARACAY                 | 1995 | 1995 | 1    |
| MARSEILLE               | 1998 | 2017 | 5    |
| MARTINSBURG             | 2000 | 2000 | 1    |
| MELBOURNE               | 2013 | 2018 | 68   |
| MEXICO-CITY             | 1994 | 2018 | 49   |
| MIAMI                   | 1994 | 2020 | 139  |
| MILANO                  | 2016 | 2018 | 2    |
| MILWAUKEE               | 2003 | 2003 | 4    |
| MINNEAPOLIS             | 2013 | 2019 | 124  |
| MIYAZAKI                | 2014 | 2014 | 1    |
| MONTEVIDEO              | 1994 | 2016 | 28   |
| MONTREAL                | 1994 | 2019 | 331  |
| MOSCOW                  | 2011 | 2018 | 2    |
| MUMBAI                  | 1996 | 2021 | 211  |
| MUNICH                  | 1996 | 2020 | 1340 |
| MUSCAT                  | 2002 | 2015 | 50   |
| NAGOYA                  | 1997 | 2020 | 826  |
| NAIROBI                 | 1994 | 2020 | 97   |
| NANAIMO                 | 2014 | 2014 | 1    |
| NANCHANG                | 2013 | 2018 | 5    |
| NANJING                 | 2009 | 2020 | 304  |
| NDJAMENA                | 2013 | 2018 | 16   |
| NEFTEYUGANSK            | 2015 | 2015 | 1    |
| NEW-ORLEANS             | 1997 | 1997 | 1    |
| NEW-YORK                | 1994 | 2021 | 1977 |

---



---

|                   |      |      |      |
|-------------------|------|------|------|
| NIAMEY            | 2002 | 2018 | 66   |
| NICE              | 1994 | 2018 | 6    |
| NINBO             | 2012 | 2018 | 38   |
| NOUAKCHOTT        | 2003 | 2018 | 70   |
| NUREMBERG         | 2007 | 2018 | 2    |
| OBIHIRO           | 2017 | 2018 | 3    |
| OKINAWA           | 2012 | 2019 | 67   |
| ORLANDO           | 2008 | 2013 | 10   |
| OSAKA             | 1994 | 2020 | 1609 |
| OSTEND            | 1994 | 2000 | 3    |
| OUAGADOUGOU       | 2002 | 2018 | 100  |
| PALMA-DE-MALLORCA | 2001 | 2001 | 1    |
| PANAMA-CITY       | 2014 | 2020 | 75   |
| PAPEETE           | 2017 | 2018 | 2    |
| PARCHIM           | 2011 | 2011 | 1    |
| PARIS             | 1994 | 2018 | 3804 |
| PAYA-LEBAR        | 1998 | 1998 | 1    |
| PENANG            | 2013 | 2015 | 3    |
| PERTH             | 2013 | 2017 | 32   |
| PHILADELPHIA      | 1999 | 2019 | 619  |
| PHNOM-PENH        | 2014 | 2014 | 1    |
| PHOENIX           | 2001 | 2018 | 12   |
| PISA              | 1998 | 1998 | 1    |
| POINTE-A-PITRE    | 2013 | 2018 | 15   |
| POINTE-NOIRE      | 2014 | 2018 | 16   |
| PORLAMAR          | 2001 | 2001 | 2    |
| PORT-HARCOURT     | 2002 | 2020 | 126  |
| PORTLAND          | 2003 | 2018 | 310  |
| PRAGUE            | 2016 | 2016 | 1    |
| PUERTO-PLATA      | 1995 | 2002 | 9    |
| PULA              | 2018 | 2018 | 1    |
| PUNTA-CANA        | 1995 | 2021 | 10   |
| QINGDAO           | 2012 | 2020 | 182  |
| QUEBEC            | 2015 | 2015 | 1    |
| QUITO             | 1994 | 2016 | 74   |
| RECIFE            | 1994 | 1995 | 11   |
| REYKJAVIK         | 2003 | 2013 | 8    |
| RHODES            | 1996 | 2002 | 8    |
| RIGA              | 2006 | 2006 | 1    |
| RIO-DE-JANEIRO    | 1994 | 2016 | 402  |
| RIYADH            | 1999 | 2020 | 254  |
| ROME              | 2002 | 2016 | 8    |
| SAINT-MARTIN      | 1994 | 2018 | 114  |
| SALVADOR          | 2013 | 2015 | 26   |
| SALZBURG          | 1996 | 1996 | 1    |
| SAN-DIEGO         | 2017 | 2020 | 71   |
| SAN-FRANCISCO     | 1994 | 2019 | 265  |
| SAN-JOSE          | 2014 | 2020 | 45   |
| SAN-JUAN          | 1994 | 1995 | 28   |
| SAN-SALVADOR      | 2014 | 2015 | 23   |
| SANAA             | 2000 | 2004 | 6    |
| SANTA-MARIA       | 2004 | 2004 | 1    |
| SANTIAGO          | 1994 | 2016 | 20   |
| SANTO-DOMINGO     | 1996 | 2016 | 3    |
| SANYA             | 2017 | 2017 | 2    |
| SAO-PAULO         | 1994 | 2016 | 377  |

---

---

|                    |      |      |      |
|--------------------|------|------|------|
| SAPPORO            | 2014 | 2020 | 45   |
| SEATTLE            | 2013 | 2021 | 64   |
| SEOUL              | 1994 | 2020 | 476  |
| SHANGHAI           | 1997 | 2020 | 428  |
| SHANNON            | 1999 | 1999 | 1    |
| SHENYANG           | 2012 | 2020 | 151  |
| SHENZHEN           | 2014 | 2020 | 4    |
| SINGAPORE          | 1995 | 2021 | 325  |
| SOESTERBERG        | 2014 | 2014 | 1    |
| SOKOTO             | 2018 | 2018 | 1    |
| SPANGDAHLEM        | 2016 | 2016 | 1    |
| ST.-JOHN'S         | 2009 | 2009 | 1    |
| STRASBOURG         | 1997 | 2001 | 3    |
| SURABAYA           | 2013 | 2019 | 74   |
| SYDNEY             | 2013 | 2020 | 169  |
| TAHOUA             | 2018 | 2018 | 2    |
| TAIPEI             | 2012 | 2019 | 1944 |
| TAKAMATSU          | 1998 | 2018 | 4    |
| TAMANRASSET        | 2018 | 2018 | 2    |
| TAMPA              | 2018 | 2019 | 5    |
| TASHKENT           | 2001 | 2001 | 1    |
| TEHRAN             | 1997 | 2019 | 412  |
| TEL-AVIV           | 1994 | 2018 | 275  |
| TENERIFE           | 1995 | 1998 | 11   |
| THESSALONIKI       | 1999 | 1999 | 2    |
| TIANJIN            | 1995 | 2020 | 3    |
| TIPPI              | 2018 | 2018 | 1    |
| TOKYO              | 1995 | 2020 | 1577 |
| TORONTO            | 1994 | 2021 | 821  |
| TOULOUSE           | 1995 | 2015 | 18   |
| UNKNOWN            | 1994 | 2020 | 905  |
| URUMQI             | 2016 | 2017 | 9    |
| VANCOUVER          | 1995 | 2020 | 771  |
| VARADERO           | 2001 | 2002 | 6    |
| VIENNA             | 1995 | 2017 | 3318 |
| WAHIAWA            | 2017 | 2017 | 1    |
| WASHINGTON         | 1994 | 2021 | 410  |
| WEST-HAMPTON-BEACH | 1998 | 1999 | 3    |
| WINDHOEK           | 1997 | 2013 | 1234 |
| WUHAN              | 2012 | 2019 | 52   |
| WUXI               | 2016 | 2019 | 16   |
| XI'AN              | 2016 | 2019 | 12   |
| XIAMEN             | 2012 | 2019 | 133  |
| YAOUNDE            | 1997 | 2017 | 26   |
| YENBO              | 2018 | 2018 | 1    |
| ZHENGZHOU          | 2012 | 2018 | 21   |
| ZHEZKAZGAN         | 2018 | 2018 | 1    |
| ZHUHAI             | 2014 | 2016 | 2    |
| ZURICH             | 1997 | 2013 | 7    |

---

**Table S3.** Validation of the trajectory-derived (TOST) against ozonesonde measurement by decade from the 1980s to 2010s. The validation of SAGE and MLS ozone in the corresponding decade is provided as a comparison. Note that only ozone profiles from 16-26 km are compared in this table.

|                   | 1980s  |        | 1990s  |        | 2000s  |        | 2010s  |        |
|-------------------|--------|--------|--------|--------|--------|--------|--------|--------|
|                   | TOST   | SAGE   | TOST   | SAGE   | TOST   | MLS    | TOST   | MLS    |
| <b>R</b>          | 0.96   | 0.96   | 0.96   | 0.96   | 0.96   | 0.96   | 0.97   | 0.97   |
| <b>RMSD (ppb)</b> | 449.47 | 469.31 | 486.00 | 455.40 | 485.18 | 494.21 | 448.89 | 461.02 |
| <b>Bias (ppb)</b> | 13.75  | -39.73 | 41.82  | 27.73  | 12.37  | 107.47 | 0.15   | 98.77  |
| <b>RD (%)</b>     | 0.51   | -1.48  | 1.56   | 1.03   | 0.50   | 4.41   | 0.01   | 3.96   |
| <b>N</b>          | 2629   | 2629   | 6717   | 6717   | 30366  | 30366  | 47904  | 47904  |

**Table S4.** Comparisons of data coverage, number of ozonesonde stations and ozonesonde profiles between TOST-v1 and TOST-v2.

| <b>Data coverage (%)</b>   | <b>90°-60°S</b> | <b>60°-30°S</b> | <b>30°S-30°N</b> | <b>30°-60°N</b> | <b>60°-90°N</b> |
|----------------------------|-----------------|-----------------|------------------|-----------------|-----------------|
| TOST-v1                    | 53.57 ± 14.06   | 39.61 ± 15.75   | 24.26 ± 13.73    | 78.44 ± 18.75   | 62.61 ± 12.70   |
| TOST-v2                    | 57.40 ± 15.36   | 44.12 ± 17.42   | 28.00 ± 16.34    | 80.98 ± 18.10   | 64.24 ± 13.36   |
| <b>Ozonesonde stations</b> |                 |                 |                  |                 |                 |
| TOST-v1                    | 8               | 4               | 32               | 46              | 10              |
| TOST-v2                    | 12              | 6               | 48               | 64              | 13              |
| <b>Ozonesonde profiles</b> |                 |                 |                  |                 |                 |
| TOST-v1                    | 3764            | 2216            | 6363             | 32779           | 4765            |
| TOST-v2                    | 10176           | 4785            | 17934            | 54432           | 13630           |

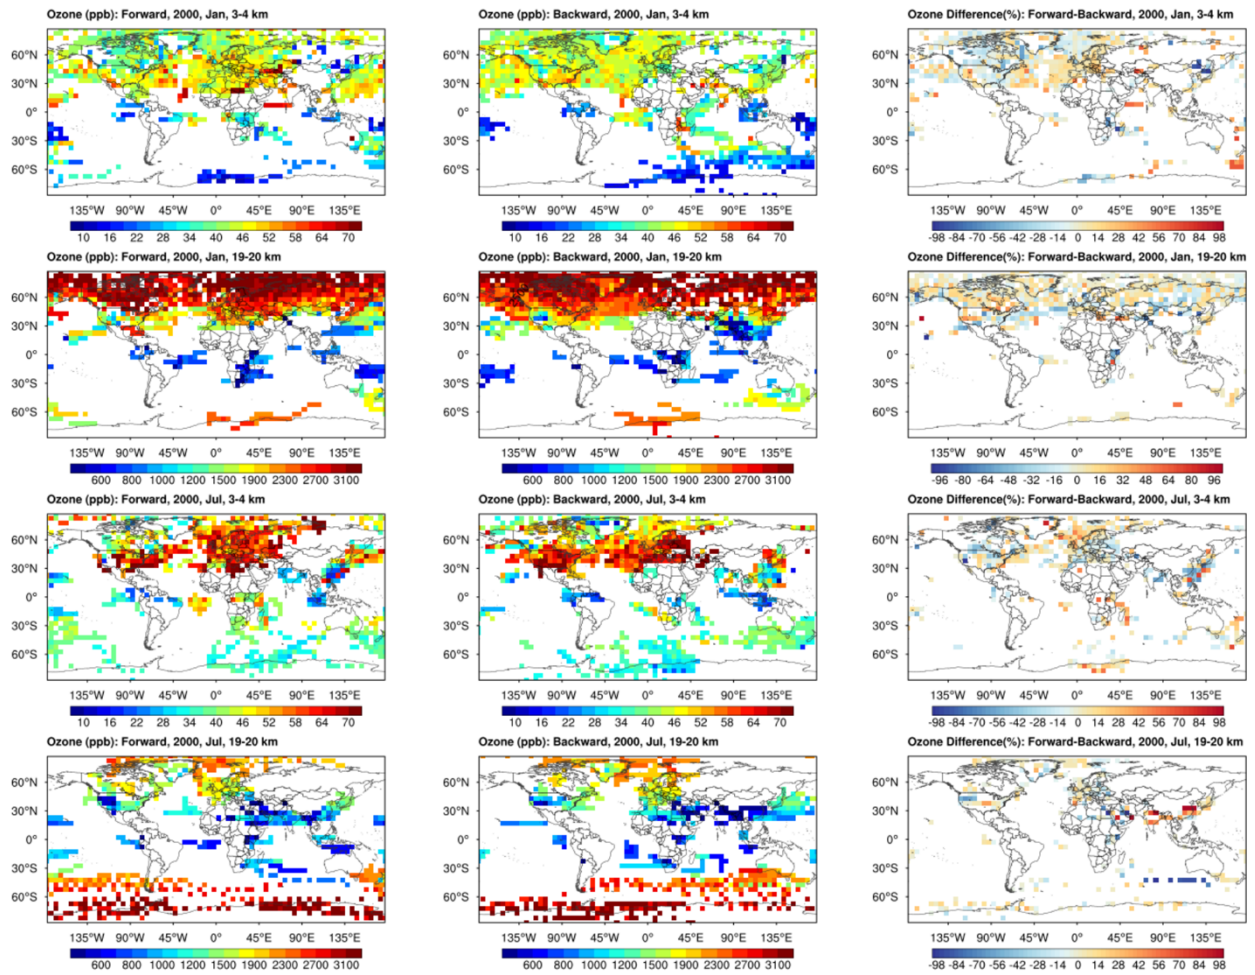

Figure S1. (a-d) Global distribution of monthly mean ozone at 3-4 km and 19-20 km in January and July 2020 from forward trajectories. (e-h) same as (a-d) but for backward trajectories. (i-l) the relative difference in monthly mean ozone between forward and backward trajectories [ $100 \times (\text{forward trajectories} - \text{backward trajectories}) / (0.5 \times \text{forward trajectories} + 0.5 \times \text{backward trajectories})$ , in %].

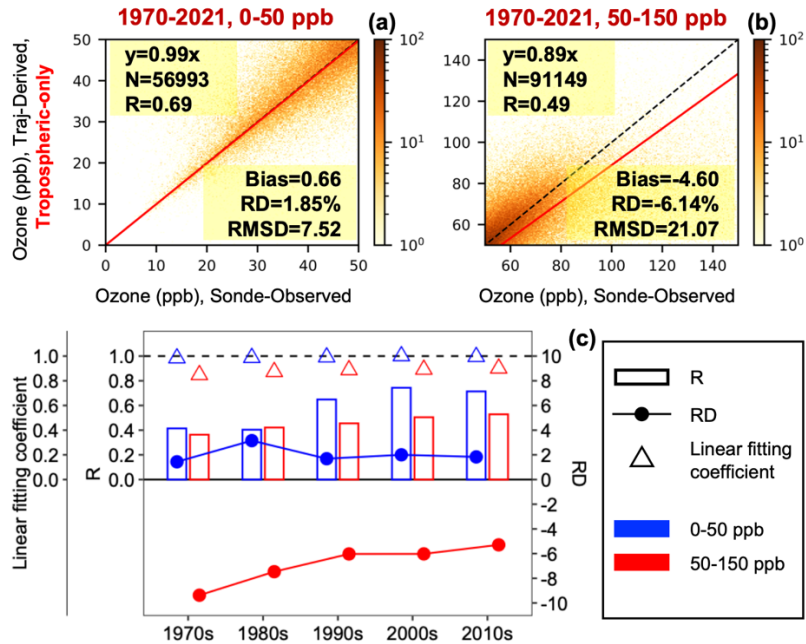

Figure S2. (a-c) Comparison of monthly average tropospheric ozone mixing ratios from ozonesondes (Sonde-Observed) and trajectory-derived TOST data with trajectories from observations only in the troposphere (Traj-Derived, tropospheric-only) for the entire study period of ozone concentration at 0-50 ppb and 50-150 ppb. Solid red lines represent the linear fitting line (with the intercept set to 0) and dashed black lines denote the 1:1 axis. N is the total number of data points, R is the correlation coefficient, Bias is the overall average difference in monthly mean values [Traj-Derived ozone - Sonde-Observed ozone, in ppb], RD is the relative difference in % [ $100 \times (\text{Traj-Derived ozone} - \text{Sonde-Observed ozone}) / \text{Sonde-Observed ozone}$ ], and RMSD is the root mean square difference in ppb). Note that Traj-Derived ozone at each station is derived without input from the station itself; that is, Traj-Derived represents an ensemble of 141 separate computations of TOST, each one withholding a single validation station. (d) the R (bars), RD (dots and lines) and linear fitting coefficient (with the intercept set to 0; triangles) between the Traj-Derived ozone and Sonde-Observed ozone by decade. The dashed line denotes where the linear fitting coefficient is 1.

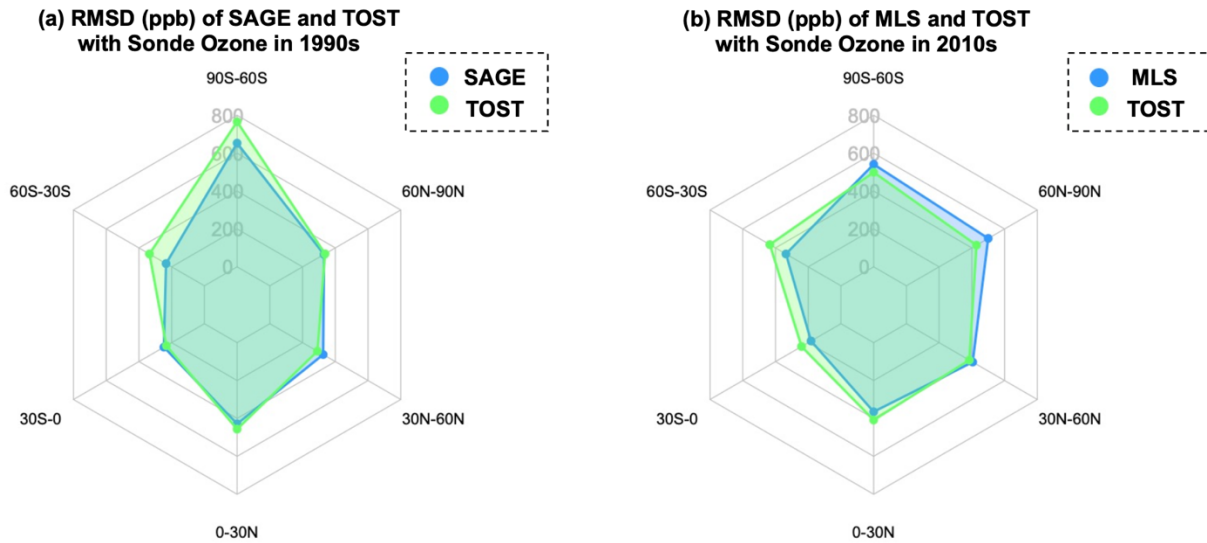

Figure S3. Radar plot for RMSD of TOST Traj-derived and satellite ozone data against ozonesonde measurements at different latitudinal zones. (a) the RMSD for Traj-derived and SAGE ozone in the 1990s; (b) the RMSD for Traj-derived and MLS ozone in the 2010s. The RMSD in a given latitudinal zone is from the monthly ozone mixing ratios between the Traj-derived (or satellite) ozone and ozonesonde measurement in 16-26 km in that latitudinal zone. Traj-derived ozone is without the input of stations being tested.

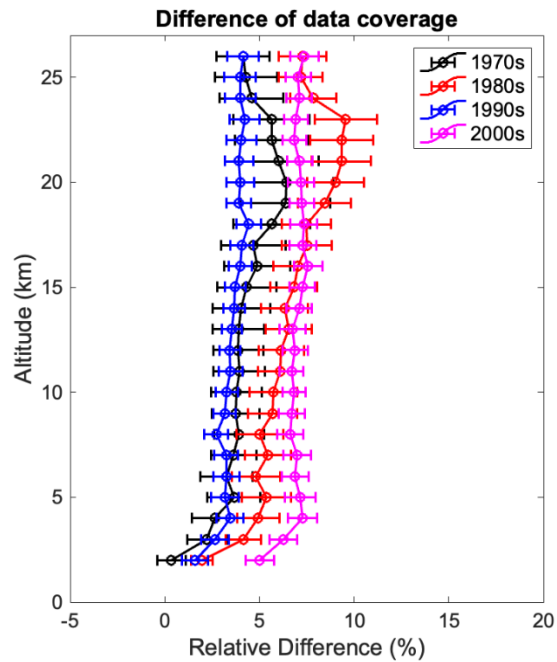

Figure S4. The mean relative difference in data coverage between TOST-v1 and TOST-v2 [ $100 \times (\text{TOST-v2 data coverage} - \text{TOST-v1 data coverage}) / \text{TOST-v1 data coverage}$  (in %)] for four decades from 1970-2008. The surface layer (0-1 km) is not compared here due to the topography issue with TOST-v1 (see Figure 9 and Section 3.3 for details).

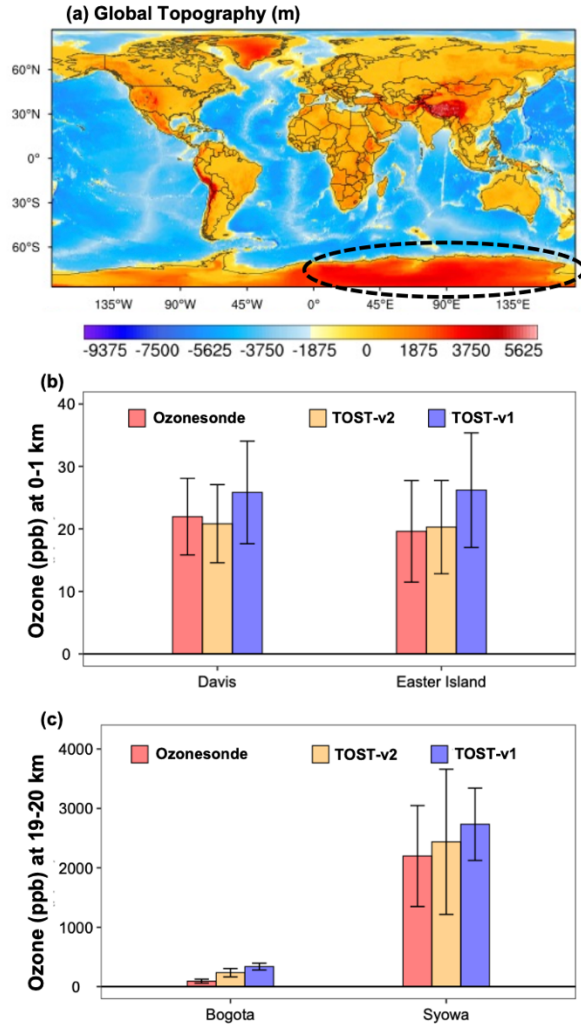

Figure S5. (a) The global topographical map. The dashed circles indicate the regions with large spatial differences between the two versions of TOST data (v1 and v2) at 0-1 km. (b, c) The mean ozone concentrations at 0-1 km and 19-20 km in the 2000s at two stations for ozonesonde, TOST-v2 and TOST-v1. Error bar represents the mean  $\pm$  standard deviation of the monthly mean ozone concentrations in this decade.
